# Supplementary material
Source: publisher figshare collection journal article supplement (https://tandf.figshare.com/ndownloader/files/16890764)
Supplement: Supplementary file 1 [file 16890764]

**Supplementary material for**

**“Alternatively spliced variants of the 5’-UTR of the ARPC2 mRNA regulate translation by an internal ribosome entry site (IRES) element harboring a guanine-quadruplex motif”**

Munir A. Al-Zeer1; Mariola Dutkiewicz 2; Annekathrin von Hacht1; Denise Kreuzmann1; Viola Röhrs1; Jens Kurreck1,*

**A**


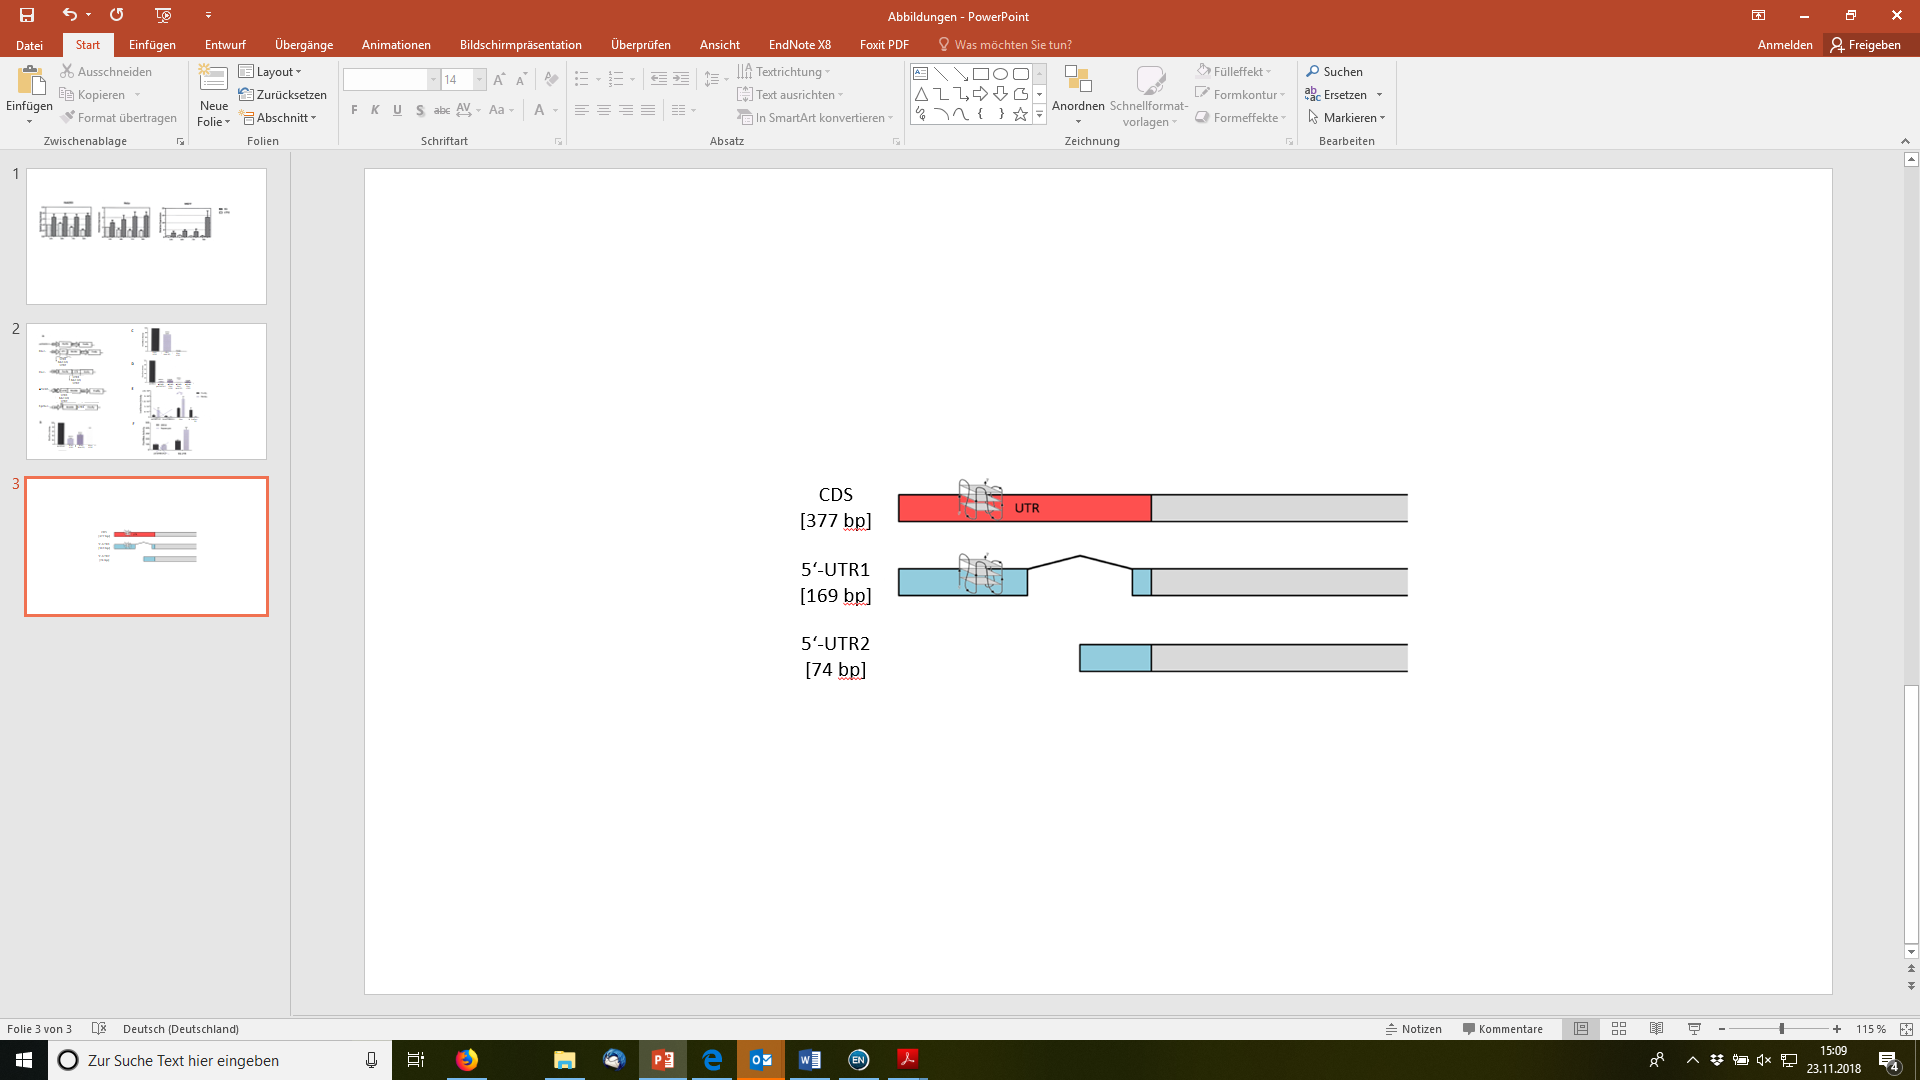


**B**


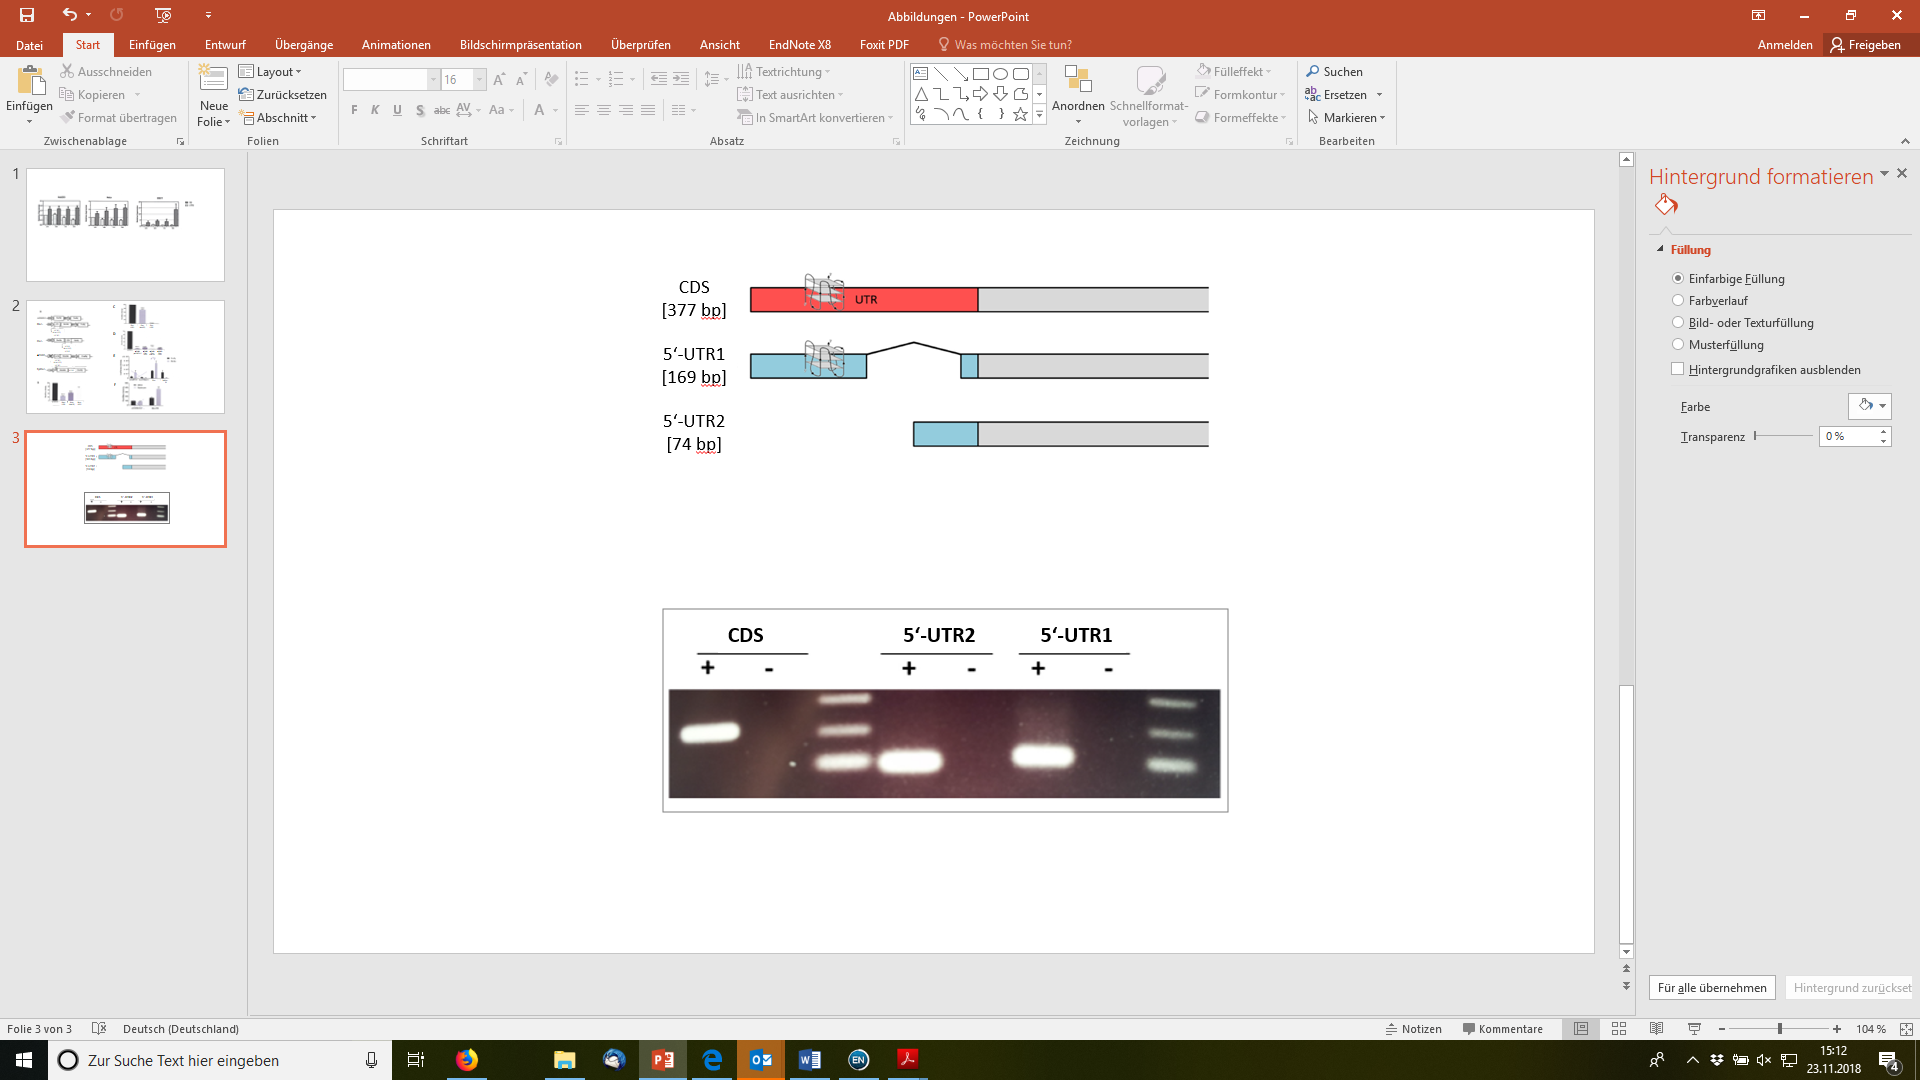


Figure S1. (A) Schematic representation of alternatively spliced ARPC2 5’-UTRs: One splice variant (ARPC2 5’-UTR1) contains a G-rich sequence with the potential to form a G-quadruplex, while the other splice variant lacks this sequence (ARPC2 5’-UTR2). (B) Both 5’-UTR variants are expressed in HEK 293 cells as demonstrated by RT-PCR (+: including reverse transcription prior to PCR; -: no reverse transcription).

The following primers were used for the PCR reactions:

ARPC2 GQ-UTR fw: GTGGGTGTGAGAGCGGAAGTG

ARPC2 GQ-UTR rev: GCCTGAACCCGCCTGC

ARPC2 GQ-UTR2 fw: CTCCCTTACCCACCCTCACC

ARPC2 GQ-UTR2 rev: ACTGCTTCCGGTTTGTTTCC

ARPC2 CDR fw: AGAAGAGGGCAAGGAAGGAG

ARPC2 CDR rev: TGGCTAAAGAGGACCTGTGG


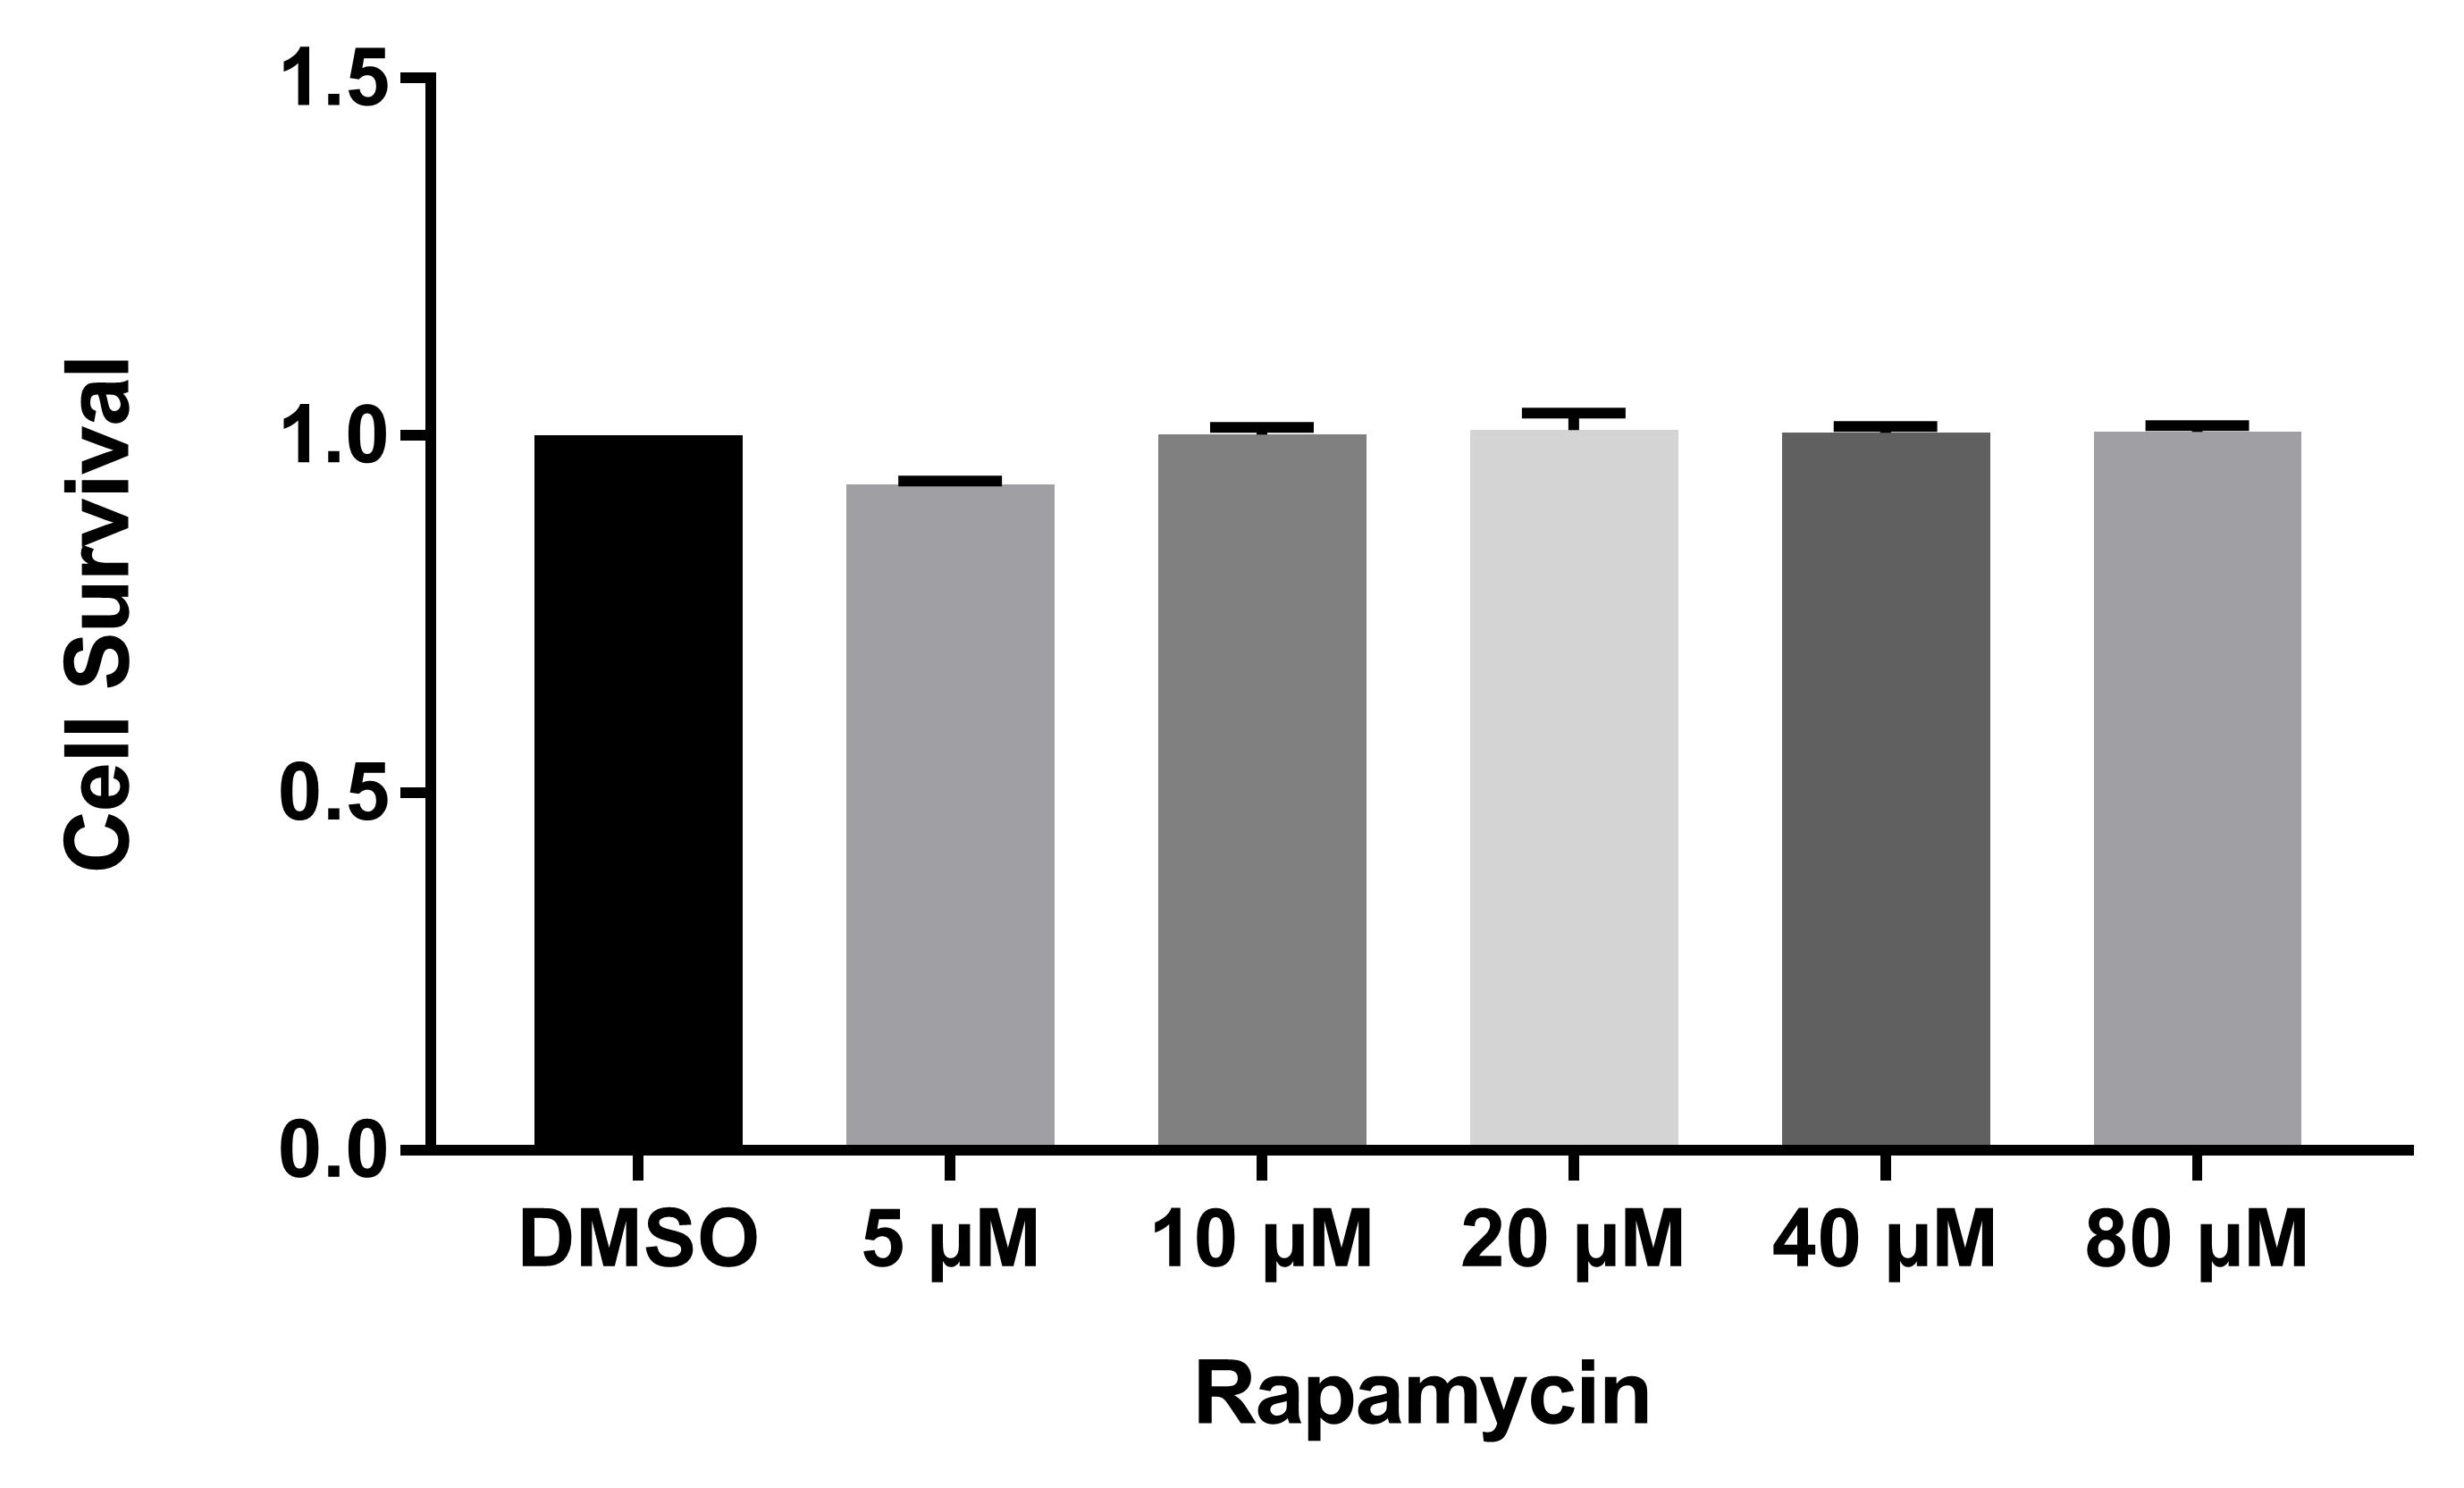


Figure S2. Monolayers of HEK293 cells were treated with rapamycin for 24 h before measuring lactate dehydrogenase (LDH) released into the medium as a measure of cell toxicity. LDH release was measured with the LDH Detection Kit (Roche, Grenzach, Germany), according to the manufacturer´s instructions. The absorbance was measured at A492 nm with a reference of A620 nm with the Sunrise Absorbance Microplate Reader (Tecan, Männedorf, Switzerland). Values were normalized to the DMSO-treated control. All Data represent averages ± SD of three independent experiments.











Figure S3. Analysis of the RNA secondary structure of the ARPC2 5’-UTR1 and its mutated variant. A, C and E show results for the long 5’-UTR1 structure harboring the putative G-quadruplex structure (GQ); whereas B, D and F show the mutated sequence that is not capable of forming a G-quadruplex structure. The RNAs were tested using NAI (A, B), Pb2+ (A, B, E, F) and DMS (C, D) *in vitro*. Autoradiograms show results of reverse transcription reaction (A-D) or the 5'-radiolabeled products (E, F). The extension primers were radioactively labeled. The chemically modified (or cleaved) nucleotide positions are indicated on the right side of the A, U, G, C-sequencing lines; N: reaction line with 200 mM NAI, Pb2+: reaction line with 0.25 – 2 mM AcOPb, 0: incubation control without Pb2+; D: reaction line with 0.3% DMS; Ci: incubation control without DMS or NAI; T1: guanine leader; L: formamide leader.
